# $\beta$ 2-Adrenergic Receptor Gene Polymorphisms and Risk of Ischemic Stroke

Rosita Stanzione, Emanuele Di Angelantonio, Anna Evangelista, Daniela Barbato, Simona Marchitti, Bastianina Zanda, Angelo Pirisi, Giovanni Quarta, Massimo Volpe, and Speranza Rubattu

**Background:**  $\beta$ 2-adrenergic receptors ( $\beta$ 2-AR) mediate vasorelaxation in response to adrenergic agents. Genetic polymorphisms of  $\beta$ 2-AR were implicated in various cardiovascular and noncardiovascular traits.

**Methods:** We tested the role of the  $\beta$ 2AR-16 and  $\beta$ 2AR-27 gene variants in the susceptibility to the development of ischemic stroke in a genetically homogenous and clinically well-characterized case-control sample that included 294 cases and 286 controls from Sardinia, Italy. This population was shown to be an optimal study sample for carrying out genetic analyses.

**Results:** Age, hypertension, dyslipidemia, and atrial fibrillation were independent risk factors for stroke in this cohort. We found that the presence of the Glu27 allelic variant was associated with a significantly increased risk

of stroke when assuming a recessive mode of inheritance (odds ratio [OR], 1.68; 95% confidence interval [CI], 1.17–2.41;  $P = .005$ ). The same results were obtained for the subgroup of ischemic strokes of arterial origin ( $n = 215$ ): OR, 1.71; 95% CI, 1.14–2.57;  $P = .009$ . Furthermore, haplotype analysis confirmed that the presence of the Glu27 allele increased the risk of cerebrovascular accidents.

**Conclusions:** Our data suggest that the Glu27 allelic variant of the  $\beta$ 2-AR gene may be a determinant of ischemic stroke. Am J Hypertens 2007;20:657–662 © 2007 American Journal of Hypertension, Ltd.

**Key Words:**  $\beta$ 2-adrenergic receptor, genetics, ischemic stroke, polymorphisms.

Genetic predisposition to common forms of stroke has been convincingly demonstrated over the last few years in a hypertensive animal model of stroke, as well as in humans.<sup>1–6</sup> However, the full dissection of stroke genes remains a complex and difficult task. Among other genes, the gene encoding  $\beta$ 2-AR represents a potential candidate for ischemic stroke. This cell-surface receptor activates adenylyl cyclase by coupling to guanine nucleotide-binding proteins, is highly expressed throughout the cardiovascular system, mediates arterial vasodilation in response to adrenergic agents,<sup>7</sup> and stimulates both fibroblast and endothelial-cell proliferation.<sup>8,9</sup>

Human  $\beta$ 2-AR is encoded by an intronless gene located on chromosome 5q31–32. Several polymorphisms were identified in the coding block of the  $\beta$ 2-AR gene, resulting in amino-acid changes and alteration of the receptor func-

tion in vitro.<sup>10</sup> In particular, substitution of glycine for arginine at position 16 leads to enhanced agonist-induced desensitization, whereas substitution of glutamic acid for glutamine at position 27 associates with resistance to desensitization.<sup>11</sup> Recently, these polymorphisms were directly implicated, though with some controversy, in various cardiovascular and noncardiovascular traits, including obesity,<sup>12–15</sup> diabetes mellitus,<sup>13,14</sup> essential hypertension,<sup>15–17</sup> myocardial infarction,<sup>18–20</sup> congestive heart failure,<sup>21</sup> and asthma.<sup>22</sup> To date, only one study has investigated the relationship between  $\beta$ 2-AR polymorphisms and the occurrence of ischemic stroke.<sup>20</sup>

We performed the present study to test the hypothesis that  $\beta$ 2-AR gene variants might be associated with a modulatory effect on the risk of developing ischemic stroke in a genetically homogenous population from Sardinia, Italy.

Received August 22, 2006. First decision November 21, 2006. Accepted January 3, 2007.

From the Istituto di Ricovero e Cura a Carattere Scientifico (IRCCS) Neuromed (RS, AE, DB, SM, MV, SR), Pozzilli (Isernia), Department of Internal Medicine (EDA), First School of Medicine, University La Sapienza, Rome; Department of Neurology (BZ, AP), University of Sassari, Sassari; and Department of Cardiology (GQ, MV, SR), Second School of

Medicine, University La Sapienza, Ospedale Sant'Andrea, Rome, Italy.

Supported by grants from the Italian Ministry of Health, Rome, Italy (M.V. and S.R.), MURST 2004 (S.R.), and MURST 2005 (M.V.).

Address correspondence and reprint requests to Dr. Speranza Rubattu, IRCCS Neuromed, Polo Molisano University La Sapienza, Rome, Localita' Camerelle, 86077 Pozzilli (Isernia), Italy; e-mail: rubattu.speranza@neuromed.it

## Materials and Methods

### Study Population

The characteristics of our case-control study, including a description of selection criteria for both cases and controls, were previously described.<sup>4,5</sup> Briefly, patients were recruited at the Department of Neurology of the University of Sassari (Sassari, Sardinia, Italy). Of all consecutive patients with cerebrovascular events admitted between September 1998 and March 2003, we diagnosed 294 cases of ischemic stroke. The diagnosis of ischemic stroke was based on clear, unequivocal clinical parameters, with signs and symptoms persisting for more than 24 h, and confirmed by computed tomography scan or nuclear magnetic resonance imaging. Stroke subtypes were as follows: large-vessel disease (47%), small-artery disease (27%), embolic stroke (24%), and other origins and unknown (2%).

Unrelated control subjects ( $n = 286$ ), drawn from the same geographical area and randomly selected among patients admitted to the same hospital, were included if they had vascular risk factors or a history of cardiovascular disease (myocardial infarction, previous coronary revascularization procedure, and peripheral vascular disease), but they were excluded if they had either current or previous cerebrovascular disease. Consanguineous subjects were excluded, based on an accurate and careful family history of each individual.

Body mass index (BMI) was defined as weight divided by height squared ( $\text{kg}/\text{m}^2$ ). Hypertension was defined as present if subjects had been previously diagnosed according to World Health Organization/International Society of Hypertension guidelines and were routinely receiving antihypertensive therapy. Hypercholesterolemia was defined as a total cholesterol blood level  $>220$  mg/dL. Smoking was categorized as either past (if subjects had stopped smoking  $>2$  months before the study) or current. Alcohol consumption was defined as an intake of  $>30$  g/day. The presence or absence of diabetes, and a history of myocar-

dial infarction and peripheral arteriopathy, were recorded. The study protocol was approved by the local ethics committee, and all participants gave informed, written consent.

### DNA Isolation and $\beta$ 2-AR Genotyping

Genomic DNA was isolated from peripheral blood, using a commercially available kit (Qiagen, Chicago, IL).  $\beta$ 2-AR genotyping was performed by using standardized procedures.<sup>12</sup> Briefly, polymerase chain reactions were carried out with specific sets of oligo, processed on an MJR Thermocycler (PTC100; MJ Research, Waltham, MA), and finally subjected to digestion with the appropriate restriction enzyme: *Nco*I (New England Biolabs, Boston, MA) for the  $\beta$ 2AR-16 polymorphism, and *Bbv*I (New England Biolabs) for the  $\beta$ 2AR-27 polymorphism. The restriction digests were resolved on agarose gels and visualized by ethidium bromide staining and ultraviolet illumination.

### Statistical Analysis

Age is reported as a median value with interquartile range (IQR). Body mass index is reported as mean  $\pm$  SD. Differences in sex, BMI, and cardiovascular risk factors were assessed using the  $\chi^2$  test or Fisher's exact test, when necessary. Continuous variables were analyzed using the Wilcoxon rank-sum test, since the age distribution was skewed toward older ages.

Genotype and allele frequencies were computed for each locus, and their distribution in cases and controls was analyzed by  $\chi^2$  test with two degrees of freedom and one degree of freedom. Concordance to the frequency predicted by the Hardy-Weinberg equilibrium (HWE) was assessed by  $\chi^2$  test with one degree of freedom. The risk associated with each genotype in the occurrence of ischemic stroke was estimated by logistic regression analysis under the assumption of an additive effect (ie, fitting the three genotypes, assuming a one-step increase in odds per mutated allele) or codominant effect (ie, fitting the model

**Table 1.** Characteristics of study population

|                            | Ischemic strokes ( $n = 294$ ) | Controls ( $n = 286$ ) | P     |
|----------------------------|--------------------------------|------------------------|-------|
| Median age in years (IQR)* | 75 (68–83)                     | 73 (62–79)             | .0015 |
| Sex, male                  | 176 (59.9)                     | 163 (57.0)             | .483  |
| Smoking                    | 110 (40.6)                     | 106 (38.4)             | .601  |
| Alcohol                    | 31 (10.7)                      | 33 (11.6)              | .746  |
| BMI ( $\pm$ SD)            | 27.6 $\pm$ 6.2                 | 26.4 $\pm$ 5.6         | .420  |
| Obese subjects             | 59 (19.7)                      | 50 (17.5)              | .480  |
| Overweight subjects        | 100 (34.0)                     | 92 (32.2)              | .630  |
| Diabetes                   | 69 (23.9)                      | 80 (28.5)              | .212  |
| Hypercholesterolemia*      | 64 (22.2)                      | 35 (12.5)              | .002  |
| Hypertension*              | 187 (65.2)                     | 136 (48.6)             | <.001 |
| History of MI              | 40 (13.9)                      | 41 (14.6)              | .824  |
| Atrial fibrillation*       | 74 (25.6)                      | 43 (15.4)              | .003  |
| Peripheral arteriopathy    | 11 (3.9)                       | 14 (5.0)               | .516  |

BMI = body mass index; IQR = interquartile range; MI = myocardial infarction.

\* Variables for which a significant difference was observed between cases and controls. Percentages are given in parentheses.

**Table 2.** Genotype frequencies of the  $\beta$ 2-AR gene in cases and controls

| Genotype           | Frequency (%) |            |
|--------------------|---------------|------------|
|                    | Cases         | Controls   |
| Arg16Gly           |               |            |
| Arg16Arg           | 45 (15.3)     | 39 (13.6)  |
| Arg16Gly           | 113 (38.4)    | 120 (42.0) |
| Gly16Gly           | 136 (46.3)    | 127 (44.4) |
| HWE <i>P</i> value |               | .217       |
| Gln27Glu           |               |            |
| Gln27Gln           | 82 (27.9)     | 97 (33.9)  |
| Gln27Glu           | 89 (30.3)     | 103 (36.0) |
| Glu27Glu           | 123 (41.8)    | 86 (30.1)  |
| HWE <i>P</i> value |               | <.001      |

with the three possible genotypes as two categories against a baseline wild type). Due to the selection of cases and controls with high cardiovascular risk, a multivariable logistic model was performed that included the genetic predictor and potential confounders. In particular, the multivariate model included variables that were significant ( $P < .2$ ) in the univariate analysis or any potential confounder that changed the unadjusted odds ratio (OR) for genotype by  $>5\%$  after adjustment.<sup>23</sup> Based on these criteria, age, atrial fibrillation, hypercholesterolemia, and hypertension were included in the model. Likelihood ratio tests were used to assess the significance of the model. In addition, the unadjusted OR and the variance were corrected to account for departures from HWE, as previously suggested.<sup>24,25</sup>

Haplotype frequencies were calculated using log-linear modeling and an expectation-maximization algorithm. Both crude and adjusted logistic regression analyses were carried out with haplotypes coded as categorical variables in the allele-based dataset.

Confidence intervals for ORs were calculated by using a profile likelihood approach. All calculations were considered significant at  $P < .05$ , with no adjustment for multiple testing. Analyses were carried out using Stata 9 (Stata Crop LD, College Station, TX).

## Results

Risk factors for stroke in patients and controls are given in Table 1. Because the study recruited subjects from a neurological clinic, the age distributions in cases and controls were skewed toward higher ages.

Table 2 shows the genotype frequencies of  $\beta$ 2-AR gene polymorphisms in cases and controls. Genotype frequencies in HWE were among controls at the Arg16Gly locus, but not at the Gln27Glu locus because of excess homozygosity.

The two single nucleotide polymorphisms (SNPs) were in linkage disequilibrium ( $D'$ , 0.54;  $P < .001$ ;  $R^2$ , 0.14). Crude and adjusted analyses on the genotype and allele levels suggested that only the Gln27Glu locus had an effect on the odds of ischemic stroke when assuming either a recessive or an additive model of inheritance (Table 3). In particular, there was a significantly higher risk of ischemic stroke associated with the Glu27Glu genotype compared with the Gln27Gln genotype (crude OR, 1.69; 95% CI, 1.13–2.53; adjusted OR, 1.67; 95% CI, 1.09–2.55). After adjustment for deviations from HWE, the unadjusted odds of ischemic stroke when assuming a recessive model of inheritance were 2.40 (95% CI, 1.65–3.50).

To investigate this further, haplotypes were constructed. A logistic analysis showed that both haplotypes with a Glu27 allele conferred a significantly higher risk for ischemic stroke than did the Gly16Gln27 haplotype (OR, 1.36; 95% CI, 1.00–1.85; and OR, 1.67; 95% CI, 1.07–2.62, respectively; Table 4). However, after adjusting for hypercholesterolemia, hypertension, atrial fibrillation, and age, statistical significance was not attained (Table 4).

Finally, the analysis was repeated on cases of arterial origin only and their controls (215 cases and 236 controls). In this subgroup, crude and adjusted analyses showed that only the Gln27Glu locus had an effect on the risk of ischemic stroke when assuming either a recessive (adjusted OR, 1.71; 95% CI, 1.14–2.57;  $P = .009$ ) or an additive (adjusted OR, 1.33; 95% CI, 1.05–1.69;  $P = .02$ ) model of inheritance. Thus, subjects carrying the Glu27 allele had the highest risk.

**Table 3.** Risk of ischemic stroke in cases and in controls

|                | Unadjusted       |                | Adjusted*        |                |
|----------------|------------------|----------------|------------------|----------------|
|                | OR (95% CI)      | <i>P</i> value | OR (95% CI)      | <i>P</i> value |
| $\beta$ 2AR-16 |                  |                |                  |                |
| Recessive      | 1.08 (0.77–1.49) | .654           | 1.03 (0.73–1.46) | .860           |
| Additive       | 1.00 (0.80–1.26) | .975           | 0.99 (0.78–1.26) | .943           |
| Dominant       | 0.87 (0.55–1.39) | .568           | 0.91 (0.56–1.48) | .695           |
| $\beta$ 2AR-27 |                  |                |                  |                |
| Recessive      | 1.67 (1.19–2.36) | .003           | 1.68 (1.17–2.41) | .005           |
| Additive       | 1.31 (1.07–1.60) | .009           | 1.30 (1.05–1.61) | .016           |
| Dominant       | 1.33 (0.93–1.89) | .117           | 1.29 (0.89–1.88) | .182           |

\* Adjusted for hypercholesterolemia, hypertension, atrial fibrillation, and age.

**Table 4.** Haplotype frequencies of the  $\beta$ 2-AR gene in cases and controls, and crude and adjusted\* odds ratios

| Haplotype  | Frequency (%) |            | Odds ratios (95% CI) |                  |
|------------|---------------|------------|----------------------|------------------|
|            | Cases         | Controls   | Crude                | Adjusted*        |
| Arg16Gln27 | 118 (20.0)    | 139 (24.3) | 1.00 (reference)     | 1.00 (reference) |
| Gly16Gln27 | 135 (23.0)    | 158 (27.6) | 1.00 (0.70–1.42)     | 0.95 (0.65–1.40) |
| Arg16Glu27 | 85 (14.5)     | 59 (10.3)  | 1.67 (1.07–2.62)     | 1.56 (0.96–2.53) |
| Gly16Glu27 | 250 (42.5)    | 216 (37.8) | 1.36 (1.00–1.85)     | 1.25 (0.89–1.74) |

\* Adjusted for hypercholesterolemia, hypertension, atrial fibrillation, and age.

## Discussion

The results of our study, after adjusting for possible confounders, suggest that subjects harboring the Glu27 allele of the  $\beta$ 2-AR gene have an increased risk of ischemic stroke. The same significant results were obtained when only strokes of arterial origin were considered.  $\beta$ 2-AR plays a fundamental role in the control of vascular tone and in the process of vascular remodeling.<sup>7–9</sup> Molecular variants of the  $\beta$ 2-AR gene were previously identified, and their functional significance was investigated.<sup>10,11</sup> In particular, these in vitro studies revealed decreased receptor downregulation in the presence of the Glu27 allele. Moreover, enhanced vasodilation in response to isoproterenol in healthy subjects homozygous for the Glu27 allele was reported.<sup>26</sup>

Based on these findings, a potential contribution of the Glu27 allele in determining a predisposition to developing cardiovascular diseases could be hypothesized. In this regard, Large et al found that the Gln27Glu polymorphism is a genetic marker for human obesity.<sup>12</sup> However, other studies failed to confirm this evidence.<sup>14,15</sup> Moreover, contrasting evidence exists with regard to the role of the Glu27 allele on the risk of myocardial infarction, because a lower risk of coronary events was described in the elderly,<sup>20</sup> whereas an increased risk of coronary atherosclerosis was reported by others in a large prospective study.<sup>19</sup>

In regard to ischemic stroke, the only study that has been reported so far found no association of the  $\beta$ 2-AR genotype and the occurrence of cerebrovascular events.<sup>20</sup> Therefore, to date, our findings represent the first demonstration that the Glu27 allele is significantly associated with an increased risk of ischemic stroke after adjustment for other stroke risk factors, including hypertension, present in our Sardinian sample. Because BMI did not represent a predisposing risk factor for stroke in our sample, it is unlikely that the effect of the  $\beta$ 2AR/Glu27 allele could be mediated by obesity.

The strength of our study lies, first of all, in the characteristics of our human sample. In fact, it derives from a geographical area with a well-known elevated degree of genetic homogeneity,<sup>27,28</sup> and it was shown to be a highly conservative sample.<sup>4,5</sup> Moreover, the degree of association was unchanged when only strokes of arterial origin

were considered, despite the decrease in sample size. Furthermore, the haplotype analysis showed that only the presence of the Glu27 allele, but not of the Gly16 allele, was responsible for an increased risk of stroke. However, statistical significance was not attained after adjusting for possible confounders.

In the latter regard, our study adds interesting information about the controversial issue of which allele (Gly16 or Glu27) dominates the phenotype. In fact, based on discrepancies between in vitro and ex vivo findings, it was suggested that Gly16 is the dominant allele. We confirmed a significant linkage disequilibrium between codon 16 and codon 27 in Sardinians, with allele frequencies similar to those reported for other white populations.<sup>20</sup> Furthermore, among Sardinians, we identified a percentage of individuals harboring the Arg16/Glu27  $\beta$ 2-AR haplotype higher than that reported for other ethnic groups. In fact, these individuals had a risk for stroke above 1 (1.67 in the crude analysis and 1.56 after multivariate analysis). Therefore, the Glu27 allele seems to be the most relevant determinant of the risk of stroke, at least among Sardinians.

In the attempt to find a pathophysiological link with the increased risk of stroke in carriers of the Glu27 allele, several observations can be taken into account. It was shown that  $\beta$ 2-AR stimulates cellular proliferation in several tissues, including the endothelium, by activation of extracellular signal regulated kinase (ERK) and the release of vascular endothelial growth factor (VEGF).<sup>8,9</sup> Furthermore,  $\beta$ -blockers are known to exert a significant protective effect on the incidence of cardiovascular events and mortality,<sup>29</sup> and they were shown to inhibit coronary atherosclerosis in monkeys fed an atherogenic diet,<sup>30</sup> and to reduce the rate of progression of carotid atherosclerosis in clinically healthy and symptom-free subjects with carotid plaque.<sup>31</sup> Therefore, the reduced downregulation of  $\beta$ 2-AR in subjects carrying the Glu27 allele may mediate, through an enhanced adrenergic stimulation of vascular tissue, a major effect on the progression of atherosclerosis and a determination of its clinical sequelae.

A potential limitation of our study is the recruitment of a hospital-based control cohort with an incidence of cardiovascular disease and related risk factors higher than expected in a cohort of healthy subjects. Thus, the domain of our study appears to be restricted mainly to patients



with vascular disease, ie, patients with cerebrovascular disease and those with other forms of atherosclerotic disease or risk factors for it.

Furthermore, we observed a deviation from HWE in controls for the Gln27Glu variant. The HWE may be violated because of genotyping error, chance, inbreeding, nonrandom mating, differential survivorship of marker carriers, genetic drift, population stratification, or a combination of these factors. However, there is no evidence in other studies on this cohort<sup>4,5</sup> of any deviation from HWE, which militates against this observation arising from random mating. It is likely that selective pressure acts to maintain Hardy-Weinberg disequilibrium at this locus because it may have a functional role.

Finally, we are aware of the issue of multiple testing performed thus far in our sample. However, multilocus testing is considered a rational approach when investigating the genetic basis of complex diseases such as stroke, particularly when it is well motivated by a priori hypotheses.<sup>32</sup>

In conclusion, we provide evidence of a direct, contributory role of the Gln/Glu27  $\beta$ 2-AR gene variant in the development of ischemic stroke. Identification of the molecular mechanisms underlying the relationship between the  $\beta$ 2-AR gene and ischemic stroke may help to improve the prevention and treatment of this common disease.

## References

- Hassan A, Markus H: Genetics and ischemic stroke. *Brain* 2000; 123:1784–1812.
- Rubattu S, Lee MA, De Paolis P, Giliberti R, Lombardi A, Gigante B, Volpe M, Lindpaintner K: Altered structure, regulation and function of the gene encoding atrial natriuretic peptide in the stroke-prone spontaneously hypertensive rat. *Circ Res* 1999;85:900–905.
- Rubattu S, Ridker PM, Stampfer M, Volpe M, Hennekens CH, Lindpaintner K: The gene encoding atrial natriuretic peptide and the risk of human stroke. *Circulation* 1999;100:1722–1726.
- Rubattu S, Stanzione R, Di Angelantonio E, Zanda B, Evangelista A, Tarasi D, Gigante B, Pirisi A, Brunetti E, Volpe M: Atrial natriuretic peptide gene polymorphisms and risk of ischemic stroke in humans. *Stroke* 2004;35:814–818.
- Rubattu S, Di Angelantonio E, Stanzione R, Zanda B, Evangelista A, Pirisi A, De Paolis P, Cota L, Brunetti E, Volpe M: Gene polymorphisms of the renin-angiotensin-aldosterone system and the risk of ischemic stroke: a role of the A1166C/AT1 gene variant. *J Hypertens* 2004;22:2129–2134.
- Gulcher JR, Gretasdottir S, Helgadóttir A, Stefansson K: Genes contributing to risk of common forms of stroke. *Trends Mol Med* 2005;11:217–224.
- Guimaraes S, Moura D: Vascular adrenoceptors: an update. *Pharmacol Rev* 2001;53:319–356.
- Kim J, Eckhart AD, Eguchi S, Koch WJ: Beta-adrenergic receptor-mediated DNA synthesis in cardiac fibroblasts is dependent on transactivation of the epidermal growth factor receptor and subsequent activation of extracellular signal-regulated kinases. *J Biol Chem* 2002;277:32116–32122.
- Iaccarino G, Ciccarelli M, Sorriento D, Galasso G, Campanile A, Santulli G, Cipolletta E, Cerullo V, Cimini V, Altobelli GG, Piscione F, Priante O, Pastore L, Chiariello M, Salvatore F, Koch WJ, Trimarco B: Ischemic neovascularization enhanced by beta2-adrenergic receptor overexpression: a novel role for the endothelial adrenergic system. *Circ Res* 2005;97:1182–1189.
- Liggett SB: Functional properties of human  $\beta$ 2-adrenergic receptor polymorphisms. *News Physiol Sci* 1995;10:265–273.
- Green SA, Turki J, Innes M, Liggett SB: Amino-terminal polymorphisms of the human  $\beta$ 2-adrenergic receptor impart distinct agonist-promoted regulatory properties. *Biochemistry* 1994;33:9414–9419.
- Large V, Hellstrom L, Reynisdóttir S, Lonnqvist F, Eriksson P, Lannfelt L, Arner P: Human beta-2 adrenoceptor gene polymorphisms are highly frequent in obesity and associate with altered beta-2 adrenoceptor function. *J Clin Invest* 1997;100:3005–3013.
- Yamada K, Ishiyama-Shigemoto S, Ichikawa F, Yuan X, Koyanagi A, Koyama W, Nonaka K: Polymorphisms in the 5'-leader cistron of the beta2-adrenergic receptor gene associated with obesity and type 2 diabetes. *J Clin Endocrinol Metab* 1999;84:1754–1757.
- Kawamura T, Egusa G, Fujikawa R, Okubo M: Gln27Glu variant of the beta2-adrenergic receptor gene is not associated with obesity and diabetes in Japanese-Americans. *Metabolism* 2001;50:443–446.
- Galletti F, Iacone R, Ragone E, Russo O, Della Valle E, Siani A, Barba G, Farinaro E, Strazzullo V, Strazzullo P: Lack of association between polymorphisms in the beta2-adrenergic receptor gene, hypertension, and obesity in the Olivetti Heart Study. *Am J Hypertens* 2004;17:718–720.
- Hermann SM, Nicaud V, Tiret L, Evans A, Kee F, Ruidavets JB, Arveller D, Luc G, Morrison C, Hoehe MR, Pual M, Cambien F: Polymorphisms of the beta 2-adrenoceptor (ADRB2) gene and essential hypertension: the ECTIM and PEGASE studies. *J Hypertens* 2002;20:229–235.
- Kato N, Sugiyama T, Morita H, Kurihara H, Sato T, Yamori Y, Yazaki Y: Association analysis of beta2-adrenergic receptor polymorphisms with hypertension in Japanese. *Hypertension* 2001;37:286–292.
- Zee RY, Cook NC, Cheng S, Erlich HA, Lindpaintner K, Ridker PM: Multi-locus candidate gene polymorphisms and risk of myocardial infarction: a population-based, prospective genetic analysis. *J Thromb Haemost* 2006;4:341–348.
- Barbato E, Berger A, Delrue L, Van Durme F, Mancharan G, Boussy T, Heyndrickx GR, De Bruyne B, Ciampi Q, Vanderheyden H, Wijns W, Bartunek J: Glu27 variant of beta2-adrenergic receptor polymorphisms is an independent risk factor for coronary atherosclerotic disease. *Atherosclerosis* 2006; (in press).
- Heckbert SR, Hindorf LA, Edwards KL, Psaty BM, Lumley T, Siscovich DS, Tang Z, Durda JP, Kronmal RA, Tracy RP:  $\beta$ 2-adrenergic receptor polymorphisms and risk of incident cardiovascular events in the elderly. *Circulation* 2003;107:2021–2024.
- Wagoner LE, Craft LL, Singh B, Suresh DP, Zengel PW, McGuire N, Abraham WT, Chenier TC, Dorn GW Jr, Liggett SB: Polymorphisms of the  $\beta$ 2-adrenergic receptor determine exercise capacity in patients with heart failure. *Circ Res* 2000;86:834–840.
- Liggett SB: Polymorphisms of the  $\beta$ 2-adrenergic receptor and asthma. *Am J Respir Clin Care Med* 1997;156(Suppl):S156–S162.
- Mickey R, Greenland S: The impact of confounder selection criteria on effect estimation. *Am J Epidemiol* 1989;129:125–137.
- Schaid DJ, Jacobsen SJ: Biased tests of association: comparison of allele frequencies when departing from Hardy-Weinberg proportions. *Am J Epidemiol* 1999;149:706–711.
- Lathrop MG: Estimating genotype relative risks. *Tissue Antigens* 1983;22:160–166.
- Cockcroft JR, Gazis AG, Cross DJ, Wheatley A, Dewar J, Hall IP, Noon JP:  $\beta$ 2-adrenoceptor polymorphism determines vascular reactivity in humans. *Hypertension* 2000;36:371–375.
- Siniscaico M, Robledo R, Bender PK: Population genomics in Sardinia: a novel approach to hunt for genomic combination underlying complex trait and disease. *Cytogenet Cell Genet* 1999;86:148–152.
- Lampis R, Morelli L, Congia M: The interregional distribution of HLA class II haplotypes indicates the suitability of the Sardinian population for case-control association studies in complex disease. *Hum Mol Genet* 2000;9:2959–2965.
- Wikstrand J, Warnold I, Toumilehto J, Olsson G, Barber HJ, Eliasson K, Elmfeldt D, Jastrup B, Karatzas NB, Leer J: Metoprolol

- versus thiazide diuretics in hypertension: morbidity results from the MAPHY Study. *Hypertension* 1991;17:579–588.
30. Kaplan JR, Manuck SB, Adams MR, Weingand KW, Clarkson TB: Inhibition of coronary atherosclerosis by propranolol in behaviourally predisposed monkeys fed an atherogenic diet. *Circulation* 1987;76:1364–1372.
  31. Hedblad B, Wikstrand J, Janzon L, Wedel H, Berglund G: Low-dose metoprolol CR/XL and fluvastatin slow progression of carotid intima-media thickness: main results from the  $\beta$ -blocker cholesterol-lowering asymptomatic plaque study (BCAPS). *Circulation* 2001;103:1721–1726.
  32. Longmate JA: Complexity and power in case-control association studies. *Am J Hum Genet* 2001;68:1229–1237.
